# Supplementary material
Source: Springer Nature journal article supplement (https://www.springermedizin.de/resource/supplementary/12891_2013_1947_MOESM3_ESM.pdf/9508864)

# Residual Force

N

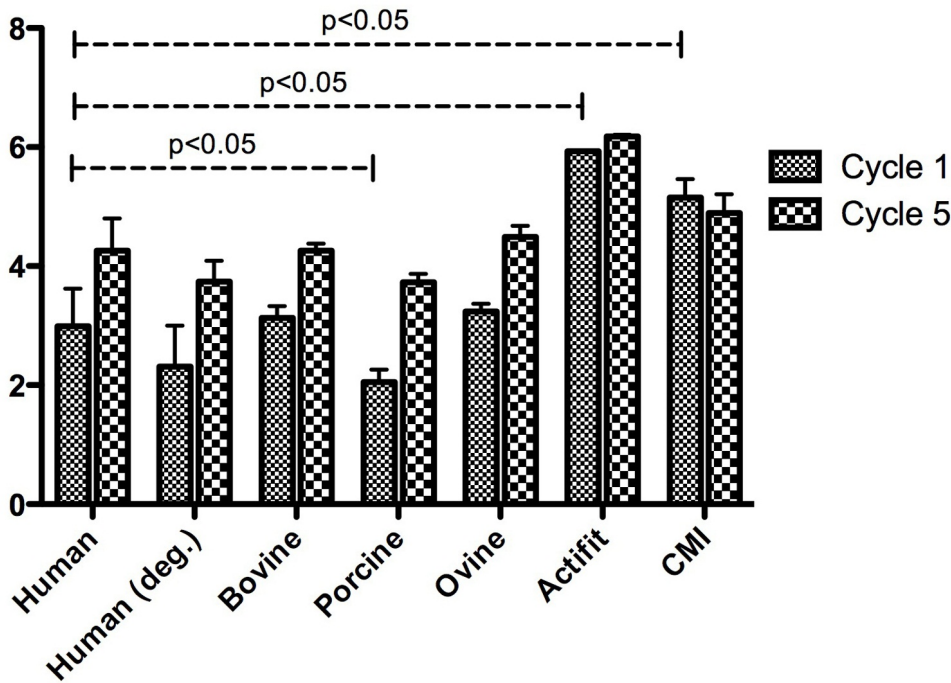

Supplement: MOESM3 [file 9508864]
